# Supplementary material for: Photosynthetic responses of Halimeda scabra (Chlorophyta, Bryopsidales) to interactive effects of temperature, pH, and nutrients and its carbon pathways
Source: PeerJ. 2021 Mar 5;9:e10958. doi: 10.7717/peerj.10958 (PMC7938779; doi:10.7717/peerj.10958)
Supplement: Supplemental Information 2 — Results of three-way ANOVA and Post hoc Newman-Keuls. [file peerj-09-10958-s002.docx]

Table S2:

Results of three-way ANOVA and Post hoc Newman-Keuls.

| Sources of variation | mean | SS | DF | MS | F | *p* |
| --- | --- | --- | --- | --- | --- | --- |
| Temperature | | 10.032 | 2 | 5.016 | 45.30 | 0.000000 |
| 24°C | 1.1665b |  |  |  |  |  |
| 28°C | 1.2219b |  |  |  |  |  |
| 33°C | 1.4318a |  |  |  |  |  |
| pH | | 0.629 | 2 | 0.315 | 2.84 | 0.058977ns |
| Nutrients  (KNO3:K3PO4) | | 1.584 | 3 | 0.528 | 4.77 | 0.002681 |
| 1.0:0.1 | 1.3085a |  |  |  |  |  |
| 5.0:0.5 | 1.1977b |  |  |  |  |  |
| 10.0:1.0 | 1.2794a |  |  |  |  |  |
| 0.0:0.0  control | 1.3106a |  |  |  |  |  |
| Temperature*pH | | 1.195 | 4 | 0.299 | 2.70 | 0.029806 |
| 24°C*pH 7.5 | 1.256b |  |  |  |  |  |
| 24°C*pH 8.2 | 1.184bc |  |  |  |  |  |
| 24°C*pH 8.6 | 1.059c |  |  |  |  |  |
| 28°C*pH 7.5 | 1.197bc |  |  |  |  |  |
| 28°C*pH 8.2 | 1.256b |  |  |  |  |  |
| 28°C*pH 8.6 | 1.213bc |  |  |  |  |  |
| 33°C*pH 7.5 | 1.435a |  |  |  |  |  |
| 33°C*pH 8.2 | 1.438a |  |  |  |  |  |
| 33°C*pH 8.6 | 1.427a |  |  |  |  |  |
| Temperature*nutrients | | 6.858 | 6 | 1.143 | 10.32 | 0.000000 |
| 24°C*1.0:0.1 | 1.408a |  |  |  |  |  |
| 24°C*5.0:0.5 | 1.081d |  |  |  |  |  |
| 24°C*10:1.0 | 1.094d |  |  |  |  |  |
| 24°C*control | 1.082d |  |  |  |  |  |
| 28°C*1.0:0.1 | 1.163cd |  |  |  |  |  |
| 28°C*5.0:0.5 | 1.149d |  |  |  |  |  |
| 28°C*10.0:1.0 | 1.204bcd |  |  |  |  |  |
| 28°C*control | 1.372ab |  |  |  |  |  |
| 33°C*1.0:0.1 | 1.355abc |  |  |  |  |  |
| 33°C*5.0:0.5 | 1.363ab |  |  |  |  |  |
| 33°C*10.0:1.0 | 1.540a |  |  |  |  |  |
| 33°C*control | 1.478a |  |  |  |  |  |
| pH*nutrients | | 6.130 | 6 | 1.022 | 9.23 | 0.000000 |
| 7.5*1.0:0.1 | 1.291abc |  |  |  |  |  |
| 7.5*5.0:0.5 | 1.296abc |  |  |  |  |  |
| 7.5*10.0:1.0 | 1.149cd |  |  |  |  |  |
| 7.5*control | 1.446a |  |  |  |  |  |
| 8.2*1.0:0.1 | 1.349ab |  |  |  |  |  |
| 8.2*5.0:0.5 | 1.202bcd |  |  |  |  |  |
| 8.2*10.0:1.0 | 1.274abcd |  |  |  |  |  |
| 8.2*control | 1.349ab |  |  |  |  |  |
| 8.6*1.0:0.1 | 1.285abcd |  |  |  |  |  |
| 8.6*5.0:0.5 | 1.095d |  |  |  |  |  |
| 8.6*10.0:1.0 | 1.414a |  |  |  |  |  |
| 8.6*control | 1.138cd |  |  |  |  |  |
| Temperature*pH*nutrients | | 6.070 | 12 | 0.506 | 4.57 | 0.000000 |
| 24°C*7.5*1.0:0.1 | 1.406 bcde |  |  |  |  |  |
| 24°C*7.5*5.0:0.1 | 1.446bc |  |  |  |  |  |
| 24°C*7.5*10.0:1.0 | 1.022fgh |  |  |  |  |  |
| 24°C*7.5*control | 1.147bcdefgh |  |  |  |  |  |
| 24°C*8.2*1.0:0.1 | 1.451bc |  |  |  |  |  |
| 24°C*8.2*5.0:0.5 | 0.877h |  |  |  |  |  |
| 24°C*8.2*10.0:1.0 | 1.196bcdefgh |  |  |  |  |  |
| 24°C*8.2*control | 1.213bcdefgh |  |  |  |  |  |
| 24°C*8.6*1.0:0.1 | 1.366bcdef |  |  |  |  |  |
| 24°C*8.6*5.0:0.5 | 0.921gh |  |  |  |  |  |
| 24°C*8.6*10.0:1.0 | 1.063efgh |  |  |  |  |  |
| 24°C*8.6*control | 0.887h |  |  |  |  |  |
| 28°C*7.5*1.0:0.1 | 1.186bcdefgh |  |  |  |  |  |
| 28°C*7.5*5.0:0.1 | 1.105bcdefgh |  |  |  |  |  |
| 28°C*7.5*10.0:1.0 | 1.081cdefgh |  |  |  |  |  |
| 28°C*7.5*control | 1.413bcde |  |  |  |  |  |
| 28°C*8.2*1.0:0.1 | 1.132bcdefgh |  |  |  |  |  |
| 28°C*8.2*5.0:0.5 | 1.271bcdefg |  |  |  |  |  |
| 28°C*8.2*10.0:1.0 | 1.179bcdefgh |  |  |  |  |  |
| 28°C*8.2*control | 1.442bcd |  |  |  |  |  |
| 28°C*8.6*1.0:0.1 | 1.169bcdefgh |  |  |  |  |  |
| 28°C*8.6*5.0:0.5 | 1.069defgh |  |  |  |  |  |
| 28°C*8.6*10.0:1.0 | 1.352bcdef |  |  |  |  |  |
| 28°C*8.6*control | 1.260bcdefg |  |  |  |  |  |
| 33°C*7.5*1.0:0.1 | 1.279bcdef |  |  |  |  |  |
| 33°C*7.5*5.0:0.1 | 1.337bcdef |  |  |  |  |  |
| 33°C*7.5*10.0:1.0 | 1.345bcdef |  |  |  |  |  |
| 33°C*7.5*control | 1.779a |  |  |  |  |  |
| 33°C*8.2*1.0:0.1 | 1.464b |  |  |  |  |  |
| 33°C*8.2*5.0:0.5 | 1.457bc |  |  |  |  |  |
| 33°C*8.2*10.0:1.0 | 1.447bcd |  |  |  |  |  |
| 33°C*8.2*control | 1.385bcdef |  |  |  |  |  |
| 33°C*8.6*1.0:0.1 | 1.320bcdef |  |  |  |  |  |
| 33°C*8.6*5.0:0.5 | 1.294bcdef |  |  |  |  |  |
| 33°C*8.6*10.0:1.0 | 1.828a |  |  |  |  |  |
| 33°C*8.6*control | 1.268bcdefg |  |  |  |  |  |
