# Supplementary material for: Photosynthetic responses of Halimeda scabra (Chlorophyta, Bryopsidales) to interactive effects of temperature, pH, and nutrients and its carbon pathways
Source: PeerJ. 2021 Mar 5;9:e10958. doi: 10.7717/peerj.10958 (PMC7938779; doi:10.7717/peerj.10958)
Supplement: Supplemental Information 3 — Raw Halimeda scabra data [file peerj-09-10958-s003.xlsx]

## Sheet: Interactive effect 
	RAW DATA		Interactive effects of pH,temperature and nutrients ratio on photosynthesis
			36 combinations tested
			Treatment levels
			pH	Temperatures (T)	Nutrient ratio (KNO3:K3PO4) µM			300 mL
			pH1= 7.5	T1= 24°C	N1= 1:0.1 µM
			pH2= 8.2	T2= 28°C	N2= 5:0.1 µM
			pH3= 8.6	T3= 33°C	N3= 10:1 µM
					N4= 0 µM (control)
			T1xpH1xN1					T1pH1N2				T1pH1N3				T1pH1N4
	Irradiance (μmol photons·m-2·s-1)	Repetitions	Initial O2 production	Final O2 production	Dry weight (g)			Initial O2 production	Final O2 production	Dry weight (g)		Initial O2 production	Final O2 production	Dry weight (g)		Initial O2 production	Final O2 production	Dry weight (g)
	0	1	6	5.8	0.0482			5.8	5.6	0.0372		5.9	5.6	0.0409		5.3	5	0.1854
	0	2	6	5.8	0.0439			5.8	5.6	0.0316		5.9	5.7	0.0297		5.3	5.1	0.0831
	0	3	6.1	5.8	0.0242			5.8	5.6	0.0378		5.9	5.7	0.0413		5.3	5.1	0.0813
	0	4	5.9	5.8	0.0433			5.8	5.6	0.0455		5.8	5.7	0.029		5.3	5.1	0.0983
	0	5	6	5.8	0.0264			5.8	5.6	0.0254		5.9	5.6	0.0423		5.3	5.1	0.1062
	0	6	6.1	5.8	0.039			5.8	5.7	0.029		5.8	5.6	0.0325		5.2	5.1	0.1243
	0	7	6	5.7	0.0392			5.8	5.6	0.0307		5.9	5.7	0.0226		5.3	5.2	0.0807
	0	Blank 8	6	6				5.8	5.8			5.9	5.9			5.3	5.3
	100	1	5.8	6				5.6	5.8			5.6	5.9			5	5.6
	100	2	5.8	6.1				5.6	5.7			5.7	5.8			5.1	5.8
	100	3	5.8	6				5.6	6			5.7	5.8			5.1	5.7
	100	4	5.8	6.2				5.6	6			5.7	5.8			5.1	5.6
	100	5	5.8	6				5.6	5.7			5.6	5.8			5.1	5.6
	100	6	5.8	6				5.7	5.8			5.6	5.9			5.1	5.7
	100	7	6	6.3				5.6	6			5.7	5.8			5.2	5.5
	100	Blank 8	6	6				5.8	5.8			5.9	5.9			5.3	5.3
	170	1	6	6.3				5.8	6			5.9	6.1			5.6	6.5
	170	2	6.1	6.4				5.7	6			5.8	6			5.8	6.3
	170	3	6	6				6	6.3			5.8	5.9			5.7	6.2
	170	4	6.2	6.5				6	6.3			5.8	6.1			5.6	6.2
	170	5	6	6.3				5.7	5.8			5.8	5.9			5.6	6.3
	170	6	6	6.2				5.8	6.1			5.9	6.2			5.7	6.3
	170	7	6.3	6.7				6	6.2			5.8	5.9			5.5	5.8
	170	Blank 8	6	6				5.8	5.8			5.9	5.9			5.3	5.3
	200	1	6.3	6.6				6	6.2			6.1	6.3			6.5	7.3
	200	2	6.4	6.8				6	6.1			6	6.2			6.3	7
	200	3	6	6.2				6.3	6.7			5.9	6			6.2	6.9
	200	4	6.5	6.7				6.3	6.5			6.1	6.4			6.2	6.7
	200	5	6.3	6.5				5.8	5.9			5.9	6			6.3	7.1
	200	6	6.2	6.4				6.1	6.3			6.2	6.5			6.3	7
	200	7	6.7	7.1				6.2	6.5			5.9	5.9			5.8	6.3
	200	Blank 8	6	6				5.8	5.8			5.9	5.9			5.3	5.3
	272	1	6.6	6.9				6.2	6.4			6.3	6.4			7.3	8.2
	272	2	6.8	7				6.1	6.2			6.2	6.3			7	7.4
	272	3	6.2	6.4				6.7	7			6	6.2			6.9	7.5
	272	4	6.7	6.9				6.5	7			6.4	6.6			6.7	7.3
	272	5	6.5	6.8				5.9	6			6	6			7.1	7.6
	272	6	6.4	6.8				6.3	6.6			6.5	6.8			7	7.6
	272	7	7.1	7.5				6.5	6.8			5.9	5.9			6.3	6.6
	272	Blank 8	6	6				5.8	5.8			5.9	5.9			5.3	5.3
	436	1	6.9	7.1				6.4	6.5			6.4	6.6			8.2	8.8
	436	2	7	7.1				6.2	6.4			6.3	6.4			7.4	8
	436	3	6.4	6.5				7	7.3			6.2	6.3			7.5	7.9
	436	4	6.9	7				7	7.3			6.6	6.7			7.3	7.8
	436	5	6.8	7				6	6.1			6	6.1			7.6	8.3
	436	6	6.8	6.9				6.6	6.7			6.8	6.9			7.6	8.2
	436	7	7.5	7.7				6.8	7			5.9	6			6.6	6.8
	436	Blank 8	6	6				5.8	5.8			5.9	5.9			5.3	5.3
	770	1	7.1	7.2				6.5	6.5			6.6	6.7			8.8	9.5
	770	2	7.1	7.3				6.4	6.4			6.4	6.5			8	8.2
	770	3	6.5	6.5				7.3	7.6			6.3	6.4			7.9	8.2
	770	4	7	7.2				7.3	7.3			6.7	6.8			7.8	8.1
	770	5	7	7.1				6.1	6.1			6.1	6.1			8.3	8.8
	770	6	6.9	7.1				6.7	7			6.9	7.1			8.2	8.7
	770	7	7.7	7.9				7	7.1			6	6			6.8	7.2
	770	Blank 8	6	6				5.8	5.8			5.9	5.9			5.3	5.3
			T1pH2N1					T1pH2N2				T1pH2 N3				T1pH2N4
	Irradiance (μmol photons·m-2·s-1)	Repetitions	Initial O2 production	Final O2 production	Dry weight (g)			Initial O2 production	Final O2 production	Dry weight (g)		Initial O2 production	Final O2 production	Dry weight (g)		Initial O2 production	Final O2 production	Dry weight (g)
	0	1	5.8	5.5	0.0433			5.8	5.6	0.0305		5.4	5.3	0.0279		5.3	5.2	0.0333
	0	2	5.8	5.5	0.0297			5.8	5.6	0.0472		5.4	5.3	0.0358		5.4	5.2	0.054
	0	3	5.8	5.6	0.0225			5.8	5.6	0.049		5.4	5.2	0.0756		5.3	5.2	0.0607
	0	4	5.8	5.6	0.0243			5.8	5.6	0.03		5.4	5.3	0.0433		5.3	5.3	0.0412
	0	5	5.8	5.6	0.0232			5.8	5.6	0.0286		5.4	5.3	0.0291		5.3	5.3	0.0375
	0	6	5.8	5.7	0.0201			5.8	5.6	0.0419		5.3	5.3	0.0322		5.3	5.2	0.0463
	0	7	5.8	5.5	0.046			5.9	5.7	0.0248		5.4	5.3	0.0463		5.3	5.2	0.0398
	0	Blank 8	5.8	5.8				5.8	5.8			5.4	5.4			5.3	5.3
	100	1	5.5	5.8				5.6	5.9			5.3	5.4			5.2	5.4
	100	2	5.5	5.8				5.6	5.8			5.3	5.6			5.2	5.5
	100	3	5.6	5.8				5.6	5.7			5.2	5.8			5.2	5.5
	100	4	5.6	5.7				5.6	5.8			5.3	5.6			5.3	5.4
	100	5	5.6	5.8				5.6	5.8			5.3	5.4			5.3	5.4
	100	6	5.7	5.7				5.6	5.8			5.3	5.4			5.2	5.4
	100	7	5.5	5.9				5.7	5.8			5.3	5.7			5.2	5.4
	100	Blank 8	5.8	5.8				5.8	5.8			5.4	5.4			5.3	5.3
	170	1	5.8	6.2				5.9	5.9			5.4	5.5			5.4	5.7
	170	2	5.8	6				5.8	5.9			5.6	5.9			5.5	5.7
	170	3	5.8	6				5.7	5.9			5.8	6.4			5.5	6
	170	4	5.7	5.8				5.8	5.9			5.6	5.8			5.4	5.6
	170	5	5.8	6				5.8	5.9			5.4	5.6			5.4	5.7
	170	6	5.7	5.9				5.8	6.1			5.4	5.7			5.4	5.6
	170	7	5.9	6.2				5.8	5.9			5.7	5.9			5.4	5.7
	170	Blank 8	5.8	5.8				5.8	5.8			5.4	5.4			5.3	5.3
	200	1	6.2	6.4				5.9	6			5.5	5.7			5.7	6
	200	2	6	6.1				5.9	6.1			5.9	6.1			5.7	6
	200	3	6	6.2				5.9	6			6.4	6.6			6	6.5
	200	4	5.8	6				5.9	6			5.8	6.2			5.6	5.7
	200	5	6	6.2				5.9	5.9			5.6	5.7			5.7	5.9
	200	6	5.9	6				6.1	6.1			5.7	5.9			5.6	5.8
	200	7	6.2	6.4				5.9	5.9			5.9	6.1			5.7	5.9
	200	Blank 8	5.8	5.8				5.8	5.8			5.4	5.4			5.3	5.3
	272	1	6.4	6.6				6	6.1			5.7	5.8			6	6.2
	272	2	6.1	6.3				6.1	6.3			6.1	6.3			6	6.2
	272	3	6.2	6.3				6	6.2			6.6	7.1			6.5	6.9
	272	4	6	6.1				6	6.1			6.2	6.5			5.7	5.8
	272	5	6.2	6.3				5.9	6.1			5.7	5.8			5.9	6.1
	272	6	6	6.1				6.1	6.4			5.9	6.1			5.8	6
	272	7	6.4	6.6				5.9	6			6.1	6.1			5.9	6.1
	272	Blank 8	5.8	5.8				5.8	5.8			5.4	5.4			5.3	5.3
	436	1	6.6	6.8				6.1	6.3			5.8	5.9			6.2	6.5
	436	2	6.3	6.5				6.3	6.4			6.3	6.4			6.2	6.5
	436	3	6.3	6.4				6.2	6.4			7.1	7.6			6.9	7.2
	436	4	6.1	6.3				6.1	6.2			6.5	6.5			5.8	5.9
	436	5	6.3	6.6				6.1	6.2			5.8	6			6.1	6.3
	436	6	6.1	6.1				6.4	6.5			6.1	6.2			6	6.2
	436	7	6.6	6.9				6	6.1			6.1	6.3			6.1	6.3
	436	Blank 8	5.8	5.8				5.8	5.8			5.4	5.4			5.3	5.3
	770	1	6.8	6.9				6.3	6.3			5.9	5.9			6.5	6.7
	770	2	6.5	6.7				6.4	6.4			6.4	6.5			6.5	6.7
	770	3	6.4	6.6				6.4	6.5			7.6	7.7			7.2	7.5
	770	4	6.3	6.3				6.2	6.3			6.5	6.7			5.9	6
	770	5	6.6	6.7				6.2	6.4			6	6			6.3	6.5
	770	6	6.1	6.2				6.5	6.5			6.2	6.3			6.2	6.4
	770	7	6.9	7.2				6.1	6.1			6.3	6.5			6.3	6.5
	770	Blank 8	5.8	5.8				5.8	5.8			5.4	5.4			5.3	5.3
			T1pH3N1					T1pH3N2				T1pH3N3				T1pH3N4
	Irradiance (μmol photons·m-2·s-1)	Repetitions	Initial O2 production	Final O2 production	Dry weight (g)			Initial O2 production	Final O2 production	Dry weight (g)		Initial O2 production	Final O2 production	Dry weight (g)		Initial O2 production	Final O2 production	Dry weight (g)
	0	1	6.1	5.7	0.0299			5.9	5.7	0.0343		6.2	6	0.0283		5.4	5.3	0.0989
	0	2	6.1	5.7	0.0415			6	5.7	0.0311		6.2	5.9	0.0379		5.4	5.3	0.0803
	0	3	6.1	5.8	0.0345			6	5.7	0.0332		6.2	5.9	0.0492		5.4	5.3	0.0942
	0	4	6.2	5.7	0.0526			6	5.7	0.0393		6.2	5.9	0.0435		5.4	5.2	0.2115
	0	5	6.1	5.7	0.0297			6	5.7	0.0336		6.2	5.9	0.0275		5.4	5.3	0.0885
	0	6	6.1	5.7	0.0324			5.9	5.7	0.0347		6.2	6	0.0368		5.4	5.3	0.0875
	0	7	6.1	5.8	0.0327			5.9	5.7	0.0389		6.2	6	0.0354		5.4	5.3	0.0536
	0	Blank 8	6.1	6.1				6	6			6.2	6.2			5.4	5.4
	100	1	5.7	6				5.7	5.9			6	6.1			5.3	5.9
	100	2	5.7	6				5.7	5.8			5.9	6.1			5.3	5.6
	100	3	5.8	5.9				5.7	5.8			5.9	6.1			5.3	5.6
	100	4	5.7	6.2				5.7	5.9			5.9	6.1			5.2	5.4
	100	5	5.7	6				5.7	5.9			5.9	6.1			5.3	5.5
	100	6	5.7	5.9				5.7	5.9			6	6.1			5.3	5.7
	100	7	5.8	6				5.7	5.9			6	6.1			5.3	5.6
	100	Blank 8	6.1	6.1				6	6			6.2	6.2			5.4	5.4
	170	1	6	6.2				5.9	6.1			6.1	6.3			5.9	6.2
	170	2	6	6.2				5.8	6			6.1	6.3			5.6	5.9
	170	3	5.9	6.1				5.8	5.9			6.1	6.4			5.6	6
	170	4	6.2	6.3				5.9	6			6.1	6.4			5.4	6
	170	5	6	6				5.9	6			6.1	6.3			5.5	6
	170	6	5.9	6.1				5.9	6			6.1	6.4			5.7	6.1
	170	7	6	6.1				5.9	6.1			6.1	6.3			5.6	5.9
	170	Blank 8	6.1	6.1				6	6			6.2	6.2			5.4	5.4
	200	1	6.2	6.3				6.1	6.3			6.3	6.6			6.2	6.7
	200	2	6.2	6.4				6	6.1			6.3	6.5			5.9	6.3
	200	3	6.1	6.4				5.9	6.1			6.4	6.6			6	6.3
	200	4	6.3	6.4				6	6.2			6.4	6.5			6	6.5
	200	5	6	6.2				6	6.2			6.3	6.5			6	6.3
	200	6	6.1	6.3				6	6.2			6.4	6.5			6.1	6.8
	200	7	6.1	6.2				6.1	6.2			6.3	6.5			5.9	6.2
	200	Blank 8	6.1	6.1				6	6			6.2	6.2			5.4	5.4
	272	1	6.3	6.5				6.3	6.4			6.6	6.7			6.7	7.2
	272	2	6.4	6.6				6.1	6.2			6.5	6.7			6.3	6.7
	272	3	6.4	6.5				6.1	6.1			6.6	7			6.3	6.8
	272	4	6.4	6.5				6.2	6.3			6.5	6.6			6.5	6.9
	272	5	6.2	6.4				6.2	6.3			6.5	6.7			6.3	6.6
	272	6	6.3	6.5				6.2	6.3			6.5	6.7			6.8	7.3
	272	7	6.2	6.3				6.2	6.4			6.5	6.6			6.2	6.5
	272	Blank 8	6.1	6.1				6	6			6.2	6.2			5.4	5.4
	436	1	6.5	6.7				6.4	6.6			6.7	6.9			7.2	7.7
	436	2	6.6	6.8				6.2	6.3			6.7	6.9			6.7	7
	436	3	6.5	6.7				6.1	6.2			7	7.1			6.8	7.4
	436	4	6.5	6.6				6.3	6.4			6.6	6.7			6.9	7.3
	436	5	6.4	6.6				6.3	6.5			6.7	6.9			6.6	6.9
	436	6	6.5	6.6				6.3	6.4			6.7	6.8			7.3	7.5
	436	7	6.3	6.5				6.4	6.6			6.6	6.7			6.5	6.8
	436	Blank 8	6.1	6.1				6	6			6.2	6.2			5.4	5.4
	770	1	6.7	6.7				6.6	6.6			6.9	7.1			7.7	7.9
	770	2	6.8	7				6.3	6.4			6.9	6.8			7	7.1
	770	3	6.7	6.7				6.2	6.2			7.1	7.4			7.4	7.7
	770	4	6.6	6.7				6.4	6.6			6.7	6.7			7.3	7.6
	770	5	6.6	6.7				6.5	6.5			6.9	7			6.9	7
	770	6	6.6	6.6				6.4	6.5			6.8	6.7			7.5	7.9
	770	7	6.5	6.6				6.6	6.7			6.7	6.8			6.8	6.9
	770	Blank 8	6.1	6.1				6	6			6.2	6.2			5.4	5.4
			T2pH1N1					T2pH1N2				T2pH1N3				T2pH1N4
	Irradiance (μmol photons·m-2·s-1)	Repetitions	Initial O2 production	Final O2 production	Dry weight (g)			Initial O2 production	Final O2 production	Dry weight (g)		Initial O2 production	Final O2 production	Dry weight (g)		Initial O2 production	Final O2 production	Dry weight (g)
	0	1	6.1	5.7	0.0569			5.8	5.6	0.029		5.8	5.5	0.0545		5.3	5.1	0.0769
	0	2	6	5.7	0.0295			5.9	5.6	0.0314		5.8	5.5	0.0421		5.4	5.2	0.1094
	0	3	6.1	5.7	0.0291			5.9	5.5	0.0385		5.8	5.6	0.0245		5.4	5.2	0.0704
	0	4	6.1	5.7	0.0422			5.8	5.6	0.0442		5.8	5.6	0.0218		5.4	5.1	0.0662
	0	5	6	5.7	0.0333			5.9	5.6	0.0309		5.8	5.4	0.0589		5.4	5.1	0.0893
	0	6	6.1	5.7	0.0373			5.9	5.6	0.0362		5.8	5.6	0.0374		5.4	5.2	0.0774
	0	7	6	5.7	0.0542			5.9	5.5	0.0425		5.8	5.6	0.0315		5.4	5.2	0.068
	0	Blank 8	6.1	6.1				5.9	5.9			5.8	5.8			5.4	5.4
	100	1	5.7	5.9				5.6	5.7			5.5	5.9			5.1	5.5
	100	2	5.7	5.8				5.6	5.8			5.5	5.7			5.2	5.7
	100	3	5.7	5.8				5.5	5.7			5.6	5.8			5.2	5.5
	100	4	5.7	5.9				5.6	5.8			5.6	5.7			5.1	5.7
	100	5	5.7	5.8				5.6	5.8			5.4	5.7			5.1	5.7
	100	6	5.7	5.9				5.6	5.8			5.6	5.7			5.2	5.5
	100	7	5.7	5.8				5.5	6			5.6	5.7			5.2	5.6
	100	Blank 8	6.1	6.1				5.9	5.9			5.8	5.8			5.4	5.4
	170	1	5.9	6.3				5.7	5.9			5.9	6.2			5.5	6.2
	170	2	5.8	6.2				5.8	5.9			5.7	5.8			5.7	6.1
	170	3	5.8	6				5.7	5.9			5.8	5.9			5.5	6
	170	4	5.9	6.2				5.8	5.9			5.7	5.8			5.7	6.1
	170	5	5.8	6				5.8	6			5.7	6.2			5.7	6.5
	170	6	5.9	6.3				5.8	5.9			5.7	5.9			5.5	6
	170	7	5.8	6				6	6.4			5.7	5.9			5.6	6.1
	170	Blank 8	6.1	6.1				5.9	5.9			5.8	5.8			5.4	5.4
	200	1	6.3	6.5				5.9	6.1			6.2	6.6			6.2	6.8
	200	2	6.2	6.3				5.9	6.1			5.8	5.9			6.1	6.6
	200	3	6	6.2				5.9	6.2			5.9	6			6	6.4
	200	4	6.2	6.5				5.9	6.2			5.8	5.9			6.1	6.7
	200	5	6	6.2				6	6.1			6.2	6.4			6.5	7
	200	6	6.3	6.5				5.9	5.9			5.9	6			6	6.5
	200	7	6	6.3				6.4	6.6			5.9	6.1			6.1	6.6
	200	Blank 8	6.1	6.1				5.9	5.9			5.8	5.8			5.4	5.4
	272	1	6.5	6.7				6.1	6.3			6.6	7			6.8	7.6
	272	2	6.3	6.4				6.1	6.2			5.9	6			6.6	7.2
	272	3	6.2	6.3				6.2	6.4			6	6.1			6.4	6.6
	272	4	6.5	6.7				6.2	6.3			5.9	6			6.7	7.3
	272	5	6.2	6.4				6.1	6.3			6.4	6.9			7	7.9
	272	6	6.5	6.7				5.9	6.1			6	6			6.5	7
	272	7	6.3	6.4				6.6	6.9			6.1	6.2			6.6	7.2
	272	Blank 8	6.1	6.1				5.9	5.9			5.8	5.8			5.4	5.4
	436	1	6.7	6.8				6.3	6.4			7	7.2			7.6	8
	436	2	6.4	6.4				6.2	6.4			6	5.9			7.2	7.6
	436	3	6.3	6.3				6.4	6.6			6.1	6.1			6.6	7.2
	436	4	6.7	6.9				6.3	6.3			6	6			7.3	7.7
	436	5	6.4	6.4				6.3	6.3			6.9	6.9			7.9	8.5
	436	6	6.7	7				6.1	6.2			6	6.3			7	7.4
	436	7	6.4	6.6				6.9	7			6.2	6.3			7.2	7.4
	436	Blank 8	6.1	6.1				5.9	5.9			5.8	5.8			5.4	5.4
	770	1	6.8	6.7				6.4	6.4			7.2	7.3			8	8.1
	770	2	6.4	6.4				6.4	6.4			5.9	5.9			7.6	8
	770	3	6.3	6.3				6.6	6.9			6.1	6			7.2	7.3
	770	4	6.9	7				6.3	6.2			6	6			7.7	8
	770	5	6.4	6.5				6.3	6.3			6.9	7.1			8.5	9
	770	6	7	7.1				6.2	6.1			6.3	6.3			7.4	7.5
	770	7	6.6	6.8				7	7			6.3	6.5			7.4	7.5
	770	Blank 8	6.1	6.1				5.9	5.9			5.8	5.8			5.4	5.4
			T2pH2N1					T2pH2N2				T2pH2N3				T2pH2N4
	Irradiance (μmol photons·m-2·s-1)	Repetitions	Initial O2 production	Final O2 production	Dry weight (g)			Initial O2 production	Final O2 production	Dry weight (g)		Initial O2 production	Final O2 production	Dry weight (g)		Initial O2 production	Final O2 production	Dry weight (g)
	0	1	5.7	5.4	0.05			5	4.8	0.435		5.3	5.1	0.0466		5.2	5	0.0868
	0	2	5.7	5.4	0.0421			5	4.8	0.0486		5.3	5	0.0736		5.3	5	0.1207
	0	3	5.7	5.3	0.0577			5	4.8	0.0446		5.3	5	0.038		5.2	5.1	0.0341
	0	4	5.7	5.4	0.0541			5	4.8	0.0451		5.3	4.9	0.0536		5.2	5	0.1199
	0	5	5.7	5.4	0.0527			5	4.8	0.0384		5.3	4.9	0.0636		5.3	5	0.0597
	0	6	5.7	5.3	0.0399			5	4.8	0.0525		5.3	5	0.0517		5.3	5	0.0893
	0	7	5.7	5.3	0.0547			5	4.8	0.0424		5.3	5	0.0564		5.2	5.1	0.0604
	0	Blank 8	5.7	5.7				5	5			5.3	5.3			5.2	5.2
	100	1	5.4	5.5				4.8	5.2			5.1	5.2			5	5.6
	100	2	5.4	5.7				4.8	4.9			5	5.1			5	5.6
	100	3	5.3	5.5				4.8	5.1			5	5.2			5.1	5.3
	100	4	5.4	5.6				4.8	5.2			4.9	5.2			5	5.6
	100	5	5.4	5.6				4.8	5.1			4.9	4.9			5	5.4
	100	6	5.3	5.6				4.8	5.3			5	5.4			5	5.5
	100	7	5.3	5.7				4.8	5.1			5	5.3			5.1	5.4
	100	Blank 8	5.7	5.7				5	5			5.3	5.3			5.2	5.2
	170	1	5.5	5.5				5.2	5.5			5.2	5.6			5.6	6.2
	170	2	5.7	5.8				4.9	5			5.1	5.2			5.6	6.5
	170	3	5.5	5.7				5.1	5.4			5.2	5.5			5.3	5.7
	170	4	5.6	5.9				5.2	5.5			5.2	5.4			5.6	6.3
	170	5	5.6	5.8				5.1	5.4			4.9	4.9			5.4	5.8
	170	6	5.6	5.8				5.3	5.8			5.4	5.8			5.5	6.3
	170	7	5.7	6				5.1	5.5			5.3	5.3			5.4	5.8
	170	Blank 8	5.7	5.7				5	5			5.3	5.3			5.2	5.2
	200	1	5.5	5.5				5.5	5.7			5.6	5.7			6.2	6.8
	200	2	5.8	6.2				5	5			5.2	5.3			6.5	7.1
	200	3	5.7	6				5.4	5.8			5.5	5.7			5.7	6
	200	4	5.9	6.3				5.5	5.9			5.4	5.7			6.3	6.8
	200	5	5.8	6.1				5.4	5.7			4.9	4.9			5.8	6.3
	200	6	5.8	6				5.8	6.2			5.8	6			6.3	6.9
	200	7	6	6.3				5.5	5.8			5.3	5.6			5.8	6.2
	200	Blank 8	5.7	5.7				5	5			5.3	5.3			5.2	5.2
	272	1	5.5	5.5				5.7	6.2			5.7	5.8			6.8	7.3
	272	2	6.2	6.4				5	5.2			5.3	5.3			7.1	7.5
	272	3	6	6.3				5.8	6.1			5.7	5.9			6	6.3
	272	4	6.3	6.6				5.9	6.1			5.7	5.9			6.8	7.3
	272	5	6.1	6.3				5.7	5.9			4.9	4.9			6.3	6.9
	272	6	6	6.2				6.2	6.7			6	6.3			6.9	7.4
	272	7	6.3	6.6				5.8	6.2			5.6	5.7			6.2	6.6
	272	Blank 8	5.7	5.7				5	5			5.3	5.3			5.2	5.2
	436	1	5.5	5.5				6.2	6.5			5.8	6			7.3	7.9
	436	2	6.4	6.5				5.2	5.1			5.3	5.3			7.5	8
	436	3	6.3	6.6				6.1	6.1			5.9	6.2			6.3	6.6
	436	4	6.6	6.8				6.1	6.3			5.9	6.3			7.3	7.8
	436	5	6.3	6.5				5.9	6.2			4.9	4.9			6.9	7.3
	436	6	6.2	6.4				6.7	7.2			6.3	6.7			7.4	7.8
	436	7	6.6	6.7				6.2	6.4			5.7	5.9			6.6	7
	436	Blank 8	5.7	5.7				5	5			5.3	5.3			5.2	5.2
	770	1	5.5	5.5				6.5	6.7			6	6.1			7.9	8.2
	770	2	6.5	6.7				5.1	4.7			5.3	5.3			8	8.3
	770	3	6.6	6.7				6.1	6.1			6.2	6.4			6.6	6.7
	770	4	6.8	6.9				6.3	6.5			6.3	6.5			7.8	8.2
	770	5	6.5	6.5				6.2	6.2			4.9	4.9			7.3	7.5
	770	6	6.4	6.6				7.2	7.4			6.7	7			7.8	8
	770	7	6.7	6.8				6.4	6.5			5.9	6			7	7.2
	770	Blank 8	5.7	5.7				5	5			5.3	5.3			5.2	5.2
			T2pH3N1					T2pH3N2				T2pH3N3				T2pH3N4
	Irradiance (μmol photons·m-2·s-1)	Repetitions	Initial O2 production	Final O2 production	Dry weight (g)			Initial O2 production	Final O2 production	Dry weight (g)		Initial O2 production	Final O2 production	Dry weight (g)		Initial O2 production	Final O2 production	Dry weight (g)
	0	1	5.2	5	0.052			5.4	5.2	0.0555		5.4	5.1	0.0688		5.3	5	0.0893
	0	2	5.2	5	0.0425			5.4	5.1	0.0598		5.4	5.1	0.0596		5.3	5	0.1223
	0	3	5.2	5	0.0514			5.3	5.1	0.0531		5.4	5.1	0.0577		5.3	5.1	0.1589
	0	4	5.2	5	0.0369			5.4	5.2	0.0501		5.4	5.1	0.0664		5.3	5	0.1288
	0	5	5.2	5	0.0655			5.4	5.2	0.0485		5.4	5.1	0.0613		5.3	5	0.1833
	0	6	5.2	5	0.0531			5.4	5.1	0.0615		5.4	5.2	0.0406		5.3	5	0.1217
	0	7	5.2	5	0.0393			5.4	5.1	0.0547		5.4	5.1	0.0527		5.3	5	0.1153
	0	Blank 8	5.2	5.2				5.4	5.4			5.4	5.4			5.3	5.3
	100	1	5	5.2				5.2	5.4			5.1	5.4			5	5.5
	100	2	5	5.2				5.1	5.4			5.1	5.3			5	5.6
	100	3	5	5.1				5.1	5.5			5.1	5.5			5.1	5.7
	100	4	5	5.1				5.2	5.5			5.1	5.5			5	5.8
	100	5	5	5.1				5.2	5.3			5.1	5.3			5	5.6
	100	6	5	5.3				5.1	5.4			5.2	5.5			5	6.1
	100	7	5	5.2				5.1	5.3			5.1	5.5			5	5.6
	100	Blank 8	5.2	5.2				5.4	5.4			5.4	5.4			5.3	5.3
	170	1	5.2	5.3				5.4	5.6			5.4	5.9			5.5	6.4
	170	2	5.2	5.3				5.4	5.6			5.3	5.9			5.6	6.5
	170	3	5.1	5.2				5.5	5.8			5.5	6			5.7	6.3
	170	4	5.1	5.1				5.5	5.8			5.5	6			5.8	6.5
	170	5	5.1	5.1				5.3	5.7			5.3	5.6			5.6	6.3
	170	6	5.3	5.5				5.4	5.7			5.5	6			6.1	6.8
	170	7	5.2	5.4				5.3	5.7			5.5	5.9			5.6	6.4
	170	Blank 8	5.2	5.2				5.4	5.4			5.4	5.4			5.3	5.3
	200	1	5.3	5.5				5.6	5.8			5.9	6.3			6.4	7.1
	200	2	5.3	5.6				5.6	5.8			5.9	6.1			6.5	7.2
	200	3	5.2	5.3				5.8	6.3			6	6.3			6.3	7
	200	4	5.1	5.2				5.8	6.1			6	6.3			6.5	7.6
	200	5	5.1	5.3				5.7	5.9			5.6	6			6.3	6.9
	200	6	5.5	5.9				5.7	6			6	6.2			6.8	7.9
	200	7	5.4	5.7				5.7	6			5.9	6.2			6.4	7.3
	200	Blank 8	5.2	5.2				5.4	5.4			5.4	5.4			5.3	5.3
	272	1	5.5	5.8				5.8	6.1			6.3	6.7			7.1	7.8
	272	2	5.6	5.9				5.8	6			6.1	6.6			7.2	7.9
	272	3	5.3	5.6				6.3	6.4			6.3	6.6			7	7.4
	272	4	5.2	5.3				6.1	6.4			6.3	6.6			7.6	8.4
	272	5	5.3	5.7				5.9	6.3			6	6.2			6.9	7.4
	272	6	5.9	6.3				6	6.3			6.2	6.5			7.9	8.8
	272	7	5.7	5.8				6	6.4			6.2	6.6			7.3	8.1
	272	Blank 8	5.2	5.2				5.4	5.4			5.4	5.4			5.3	5.3
	436	1	5.8	6.2				6.1	6.3			6.7	7			7.8	8.4
	436	2	5.9	6.2				6	6.3			6.6	7.1			7.9	8.6
	436	3	5.6	5.9				6.4	6.5			6.6	6.9			7.4	7.8
	436	4	5.3	5.5				6.4	6.8			6.6	6.9			8.4	9.3
	436	5	5.7	5.9				6.3	6.5			6.2	6.6			7.4	8
	436	6	6.3	6.6				6.3	6.5			6.5	6.7			8.8	9.2
	436	7	5.8	6				6.4	7			6.6	7			8.1	9
	436	Blank 8	5.2	5.2				5.4	5.4			5.4	5.4			5.3	5.3
	770	1	6.2	6.4				6.3	6.6			7	7.2			8.4	8.5
	770	2	6.2	6.5				6.3	6.5			7.1	7.3			8.6	9
	770	3	5.9	6.1				6.5	6.7			6.9	7.3			7.8	8.3
	770	4	5.5	5.7				6.8	7.1			6.9	7			9.3	9.6
	770	5	5.9	6.2				6.5	6.7			6.6	6.8			8	8.3
	770	6	6.6	7				6.5	6.7			6.7	6.9			9.2	9.6
	770	7	6	6.2				7	7.1			7	7.3			9	9.3
	770	Blank 8	5.2	5.2				5.4	5.4			5.4	5.4			5.3	5.3
			T3pH1N1					T3pH1N2				T3pH1N3				T3pH1N4
	Irradiance (μmol photons·m-2·s-1)	Repetitions	Initial O2 production	Final O2 production	Dry weight (g)			Initial O2 production	Final O2 production	Dry weight (g)		Initial O2 production	Final O2 production	Dry weight (g)		Initial O2 production	Final O2 production	Dry weight (g)
	0	1	5.4	5	0.0784			5.4	5	0.0592		5.3	5	0.0522		5.1	4.8	0.0676
	0	2	5.4	5	0.1046			5.4	5	0.0435		5.3	4.9	0.0726		5.1	4.8	0.1009
	0	3	5.4	5.1	0.0727			5.4	5	0.0533		5.3	5	0.048		5.2	4.8	0.0833
	0	4	5.4	5	0.0914			5.4	5	0.0707		5.3	5	0.0496		5.1	4.8	0.0598
	0	5	5.4	5	0.0787			5.4	5	0.0589		5.3	5	0.0626		5.1	4.8	0.0418
	0	6	5.4	5.1	0.0606			5.4	5	0.0552		5.3	4.9	0.0801		5.1	4.8	0.0491
	0	7	5.4	5.1	0.0528			5.4	4.8	0.0871		5.3	5	0.0755		5.1	4.8	0.0498
	0	Blank 8	5.4	5.4				5.4	5.4			5.3	5.3			5.1	5.1
	100	1	5	5.4				5	5.1			5	5.3			4.8	5.2
	100	2	5	5.2				5	5.1			4.9	5.5			4.8	5.4
	100	3	5.1	5.3				5	5.2			5	5.3			4.8	5.1
	100	4	5	5.4				5	5.2			5	5.3			4.8	5
	100	5	5	5.4				5	5.2			5	5.1			4.8	5.1
	100	6	5.1	5.4				5	5.1			4.9	5.6			4.8	5.1
	100	7	5.1	5.4				4.8	5.3			5	5.3			4.8	5.1
	100	Blank 8	5.4	5.4				5.4	5.4			5.3	5.3			5.1	5.1
	170	1	5.4	5.8				5.1	5.2			5.3	5.8			5.2	6
	170	2	5.2	5.5				5.1	5.2			5.5	6.2			5.4	6
	170	3	5.3	5.7				5.2	5.4			5.3	5.8			5.1	5.6
	170	4	5.4	5.8				5.2	5.6			5.3	5.6			5	5.6
	170	5	5.4	6				5.2	5.6			5.1	5.4			5.1	5.5
	170	6	5.4	5.9				5.1	5.5			5.6	6.4			5.1	5.4
	170	7	5.4	5.7				5.3	5.8			5.3	5.7			5.1	5.6
	170	Blank 8	5.4	5.4				5.4	5.4			5.3	5.3			5.1	5.1
	200	1	5.8	6.4				5.2	5.5			5.8	6.2			6	6.5
	200	2	5.5	6				5.2	5.3			6.2	6.7			6	7
	200	3	5.7	6.1				5.4	5.9			5.8	6.2			5.6	6.1
	200	4	5.8	6.1				5.6	6			5.6	5.8			5.6	6
	200	5	6	6.6				5.6	6.1			5.4	5.7			5.5	5.8
	200	6	5.9	6.4				5.5	6			6.4	6.8			5.4	5.8
	200	7	5.7	6.2				5.8	6.3			5.7	6.1			5.6	6
	200	Blank 8	5.4	5.4				5.4	5.4			5.3	5.3			5.1	5.1
	272	1	6.4	7				5.5	6			6.2	6.6			6.5	7.4
	272	2	6	6.5				5.3	5.4			6.7	7.2			7	7.6
	272	3	6.1	6.4				5.9	6.4			6.2	6.5			6.1	6.6
	272	4	6.1	6.5				6	6.4			5.8	6.2			6	6.6
	272	5	6.6	7.1				6.1	6.5			5.7	5.9			5.8	6.5
	272	6	6.4	6.7				6	6.3			6.8	7.4			5.8	6.1
	272	7	6.2	6.6				6.3	6.9			6.1	6.4			6	6.6
	272	Blank 8	5.4	5.4				5.4	5.4			5.3	5.3			5.1	5.1
	436	1	7	7.5				6	6.3			6.6	6.8			7.4	7.9
	436	2	6.5	6.8				5.4	5.9			7.2	7.7			7.6	8.2
	436	3	6.4	6.9				6.4	6.7			6.5	6.8			6.6	7
	436	4	6.5	6.8				6.4	6.9			6.2	6.4			6.6	6.8
	436	5	7.1	7.4				6.5	6.8			5.9	6			6.5	6.7
	436	6	6.7	7.2				6.3	6.6			7.4	7.9			6.1	6.4
	436	7	6.6	7				6.9	7.2			6.4	6.9			6.6	7.2
	436	Blank 8	5.4	5.4				5.4	5.4			5.3	5.3			5.1	5.1
	770	1	7.5	7.8				6.3	6.5			6.8	7			7.9	8.4
	770	2	6.8	7.2				5.9	6			7.7	7.8			8.2	8.8
	770	3	6.9	7.2				6.7	7.1			6.8	7			7	7.2
	770	4	6.8	7.1				6.9	7.2			6.4	6.5			6.8	7.4
	770	5	7.4	7.5				6.8	7.2			6	6.1			6.7	7
	770	6	7.2	7.4				6.6	6.9			7.9	8.1			6.4	6.7
	770	7	7	7.1				7.2	7.6			6.9	7.2			7.2	7.4
	770	Blank 8	5.4	5.4				5.4	5.4			5.3	5.3			5.1	5.1
			T3pH2N1					T3pH2N2				T3pH2N3				T3pH2N4
	Irradiance (μmol photons·m-2·s-1)	Repetitions	Initial O2 production	Final O2 production	Dry weight (g)			Initial O2 production	Final O2 production	Dry weight (g)		Initial O2 production	Final O2 production	Dry weight (g)		Initial O2 production	Final O2 production	Dry weight (g)
	0	1	5	4.6	0.0722			4.9	4.4	0.1039		4.9	4.4	0.0612		5.2	4.9	0.0497
	0	2	5	4.6	0.0674			4.9	4.4	0.1072		4.9	4.5	0.0536		5.2	4.9	0.0861
	0	3	5	4.6	0.0595			4.9	4.5	0.0448		4.8	4.5	0.0588		5.2	4.8	0.1161
	0	4	5	4.6	0.0689			4.9	4.5	0.0527		4.9	4.3	0.0986		5.2	4.8	0.0723
	0	5	5	4.5	0.0933			4.9	4.5	0.0728		4.8	4.3	0.0773		5.2	4.7	0.0983
	0	6	5.1	4.6	0.0806			4.9	4.4	0.0701		4.8	4.3	0.0912		5.1	4.6	0.1357
	0	7	5	4.6	0.0697			4.8	4.3	0.087		4.8	4.4	0.0413		5.1	4.8	0.095
	0	Blank 8	5	5				4.9	4.9			4.8	4.8			5.2	5.2
	100	1	4.6	5.1				4.4	4.9			4.4	4.5			4.9	5.3
	100	2	4.6	4.8				4.4	4.8			4.5	4.6			4.9	5.4
	100	3	4.6	4.9				4.5	5			4.5	4.6			4.8	5.1
	100	4	4.6	4.7				4.5	5			4.3	4.9			4.8	5.3
	100	5	4.5	4.9				4.5	4.9			4.3	4.7			4.7	5.2
	100	6	4.8	5.3				4.4	4.6			4.3	4.5			4.6	5.1
	100	7	4.6	5				4.3	4.7			4.4	4.6			4.8	5.2
	100	Blank 8	5	5				4.9	4.9			4.8	4.8			5.2	5.2
	170	1	5.1	5.6				4.9	5.6			4.5	4.6			5.3	5.7
	170	2	4.8	5.1				4.8	5.1			4.6	4.9			5.4	5.9
	170	3	4.9	5.3				5	5.5			4.6	4.9			5.1	5.9
	170	4	4.7	5.1				5	5.5			4.9	5.6			5.3	5.8
	170	5	4.9	5.6				4.9	5.3			4.7	5.3			5.2	6
	170	6	5.3	5.8				4.6	5.2			4.5	4.9			5.1	6.1
	170	7	5	5.6				4.7	5.3			4.6	4.7			5.2	5.7
	170	Blank 8	5	5				4.9	4.9			4.8	4.8			5.2	5.2
	200	1	5.6	6				5.6	6.6			4.6	5.1			5.7	6.1
	200	2	5.1	5.5				5.1	5.7			4.9	5.1			5.9	6.4
	200	3	5.3	5.7				5.5	6.1			4.9	5.4			5.9	6.5
	200	4	5.1	5.6				5.5	6.1			5.6	6.4			5.8	6.5
	200	5	5.6	6.4				5.3	5.8			5.3	5.9			6	6.7
	200	6	5.8	6.2				5.2	5.6			4.9	5.5			6.1	6.7
	200	7	5.6	6				5.3	5.6			4.7	5			5.7	6.5
	200	Blank 8	5	5				4.9	4.9			4.8	4.8			5.2	5.2
	272	1	6	6.7				6.6	7.3			5.1	5.5			6.1	6.7
	272	2	5.5	6.1				5.7	6.4			5.1	5.4			6.4	7
	272	3	5.7	6.2				6.1	6.6			5.4	6			6.5	7.3
	272	4	5.6	6.1				6.1	6.7			6.4	7.4			6.5	6.9
	272	5	6.4	7.1				5.8	6.4			5.9	6.4			6.7	7.4
	272	6	6.2	6.9				5.6	6.1			5.5	6.3			6.7	7.6
	272	7	6	6.5				5.6	6.1			5	5.4			6.5	6.8
	272	Blank 8	5	5				4.9	4.9			4.8	4.8			5.2	5.2
	436	1	6.7	7.1				7.3	8			5.5	5.9			6.7	7.3
	436	2	6.1	6.6				6.4	7			5.4	5.7			7	7.7
	436	3	6.2	6.9				6.6	7.1			6	6.5			7.3	7.7
	436	4	6.1	6.6				6.7	7.5			7.4	8			6.9	7.3
	436	5	7.1	7.5				6.4	7.1			6.4	6.9			7.4	7.8
	436	6	6.9	7.4				6.1	6.7			6.3	6.9			7.6	8.3
	436	7	6.5	7.4				6.1	6.5			5.4	5.7			6.8	7.1
	436	Blank 8	5	5				4.9	4.9			4.8	4.8			5.2	5.2
	770	1	7.1	7.4				8	8.5			5.9	6.3			7.3	7.7
	770	2	6.6	7.2				7	7.5			5.7	5.8			7.7	7.8
	770	3	6.9	7.1				7.1	7.4			6.5	6.9			7.7	8
	770	4	6.6	6.9				7.5	7.8			8	8.5			7.3	7.4
	770	5	7.5	7.9				7.1	7.6			6.9	7.5			7.8	8.1
	770	6	7.4	7.9				6.7	7			6.9	7.3			8.3	8.8
	770	7	7.4	8				6.5	6.9			5.7	6.2			7.1	7.5
	770	Blank 8	5	5				4.9	4.9			4.8	4.8			5.2	5.2
			T3pH3N1					T3pH3N2				T3pH3N3				T3pH3N4
	Irradiance (μmol photons·m-2·s-1)	Repetitions	Initial O2 production	Final O2 production	Dry weight (g)			Initial O2 production	Final O2 production	Dry weight (g)		Initial O2 production	Final O2 production	Dry weight (g)		Initial O2 production	Final O2 production	Dry weight (g)
	0	1	5.2	4.9	0.0611			5	4.7	0.0792		5	4.8	0.066		5.1	4.8	0.0771
	0	2	5.1	4.9	0.0667			5	4.7	0.0734		5	4.7	0.077		5.1	4.7	0.1127
	0	3	5.1	4.8	0.0825			5	4.7	0.089		5	4.7	0.0742		5.1	4.8	0.0873
	0	4	5.1	4.9	0.0557			5	4.7	0.0715		5	4.9	0.0314		5	4.7	0.0937
	0	5	5.2	4.8	0.0669			5	4.7	0.0977		5	4.7	0.0903		5.1	4.6	0.0897
	0	6	5.1	4.9	0.0617			5	4.8	0.0543		5	4.7	0.0961		5	4.8	0.1019
	0	7	5.2	4.9	0.1067			5	4.7	0.0854		5	4.7	0.0579		5.1	4.8	0.0815
	0	Blank 8	5.1	5.1				5	5			5	5			5.1	5.1
	100	1	4.9	5.2				4.7	4.9			4.8	5.3			4.8	5.1
	100	2	4.9	5.1				4.7	5			4.7	5.3			4.7	5.3
	100	3	4.8	5				4.7	5.1			4.7	5.3			4.8	5
	100	4	4.9	5.2				4.7	4.9			4.9	5			4.7	4.9
	100	5	4.8	5.2				4.7	5.4			4.7	5.3			4.6	5.3
	100	6	4.9	5				4.8	5.2			4.7	5.4			4.8	5.3
	100	7	4.9	5.3				4.7	5.1			4.7	5.1			4.8	5.1
	100	Blank 8	5.1	5.1				5	5			5	5			5.1	5.1
	170	1	5.2	5.5				4.9	5.3			5.3	5.8			5.1	5.7
	170	2	5.1	5.7				5	5.2			5.3	5.9			5.3	6.1
	170	3	5	5.5				5.1	5.7			5.3	6.2			5	5.2
	170	4	5.2	5.7				4.9	5.2			5	5.4			4.9	5.4
	170	5	5.2	5.7				5.4	6.1			5.3	6.2			5.3	6.1
	170	6	5	5.5				5.2	5.5			5.4	6.1			5.3	5.8
	170	7	5.3	5.7				5.1	5.7			5.1	5.7			5.1	5.4
	170	Blank 8	5.1	5.1				5	5			5	5			5.1	5.1
	200	1	5.5	5.8				5.3	5.7			5.8	6.4			5.7	6.3
	200	2	5.7	6				5.2	5.6			5.9	6.6			6.1	6.6
	200	3	5.5	5.9				5.7	6.3			6.2	7			5.2	5.4
	200	4	5.7	6.1				5.2	5.4			5.4	5.6			5.4	6
	200	5	5.7	6.3				6.1	6.9			6.2	6.9			6.1	7.1
	200	6	5.5	5.8				5.5	6			6.1	7			5.8	6.3
	200	7	5.7	6.2				5.7	6.2			5.7	6.2			5.4	6
	200	Blank 8	5.1	5.1				5	5			5	5			5.1	5.1
	272	1	5.8	6.2				5.7	6.3			6.4	6.8			6.3	6.8
	272	2	6	6.5				5.6	5.8			6.6	7.2			6.6	7.2
	272	3	5.9	6.2				6.3	7.1			7	7.8			5.4	5.8
	272	4	6.1	6.5				5.4	5.9			5.6	5.8			6	6.7
	272	5	6.3	6.8				6.9	7.5			6.9	7.5			7.1	8
	272	6	5.8	6.3				6	6.4			7	7.8			6.3	6.8
	272	7	6.2	6.7				6.2	6.7			6.2	6.8			6	6.5
	272	Blank 8	5.1	5.1				5	5			5	5			5.1	5.1
	436	1	6.2	6.5				6.3	6.8			6.8	7.1			6.8	7.3
	436	2	6.5	6.7				5.8	6.1			7.2	7.8			7.2	7.8
	436	3	6.2	6.5				7.1	7.6			7.8	8.3			5.8	6.1
	436	4	6.5	6.9				5.9	6.3			5.8	6.1			6.7	7.1
	436	5	6.8	7.3				7.5	8			7.5	8.3			8	8.8
	436	6	6.3	6.6				6.4	6.6			7.8	8.4			6.8	7.3
	436	7	6.7	7.2				6.7	7.1			6.8	7			6.5	7
	436	Blank 8	5.1	5.1				5	5			5	5			5.1	5.1
	770	1	6.5	6.9				6.8	7.2			7.1	7			7.3	7.6
	770	2	6.7	6.8				6.1	6.3			7.8	8.1			7.8	8
	770	3	6.5	6.6				7.6	8			8.3	8.6			6.1	6.2
	770	4	6.9	7.2				6.3	6.6			6.1	6.2			7.1	7.6
	770	5	7.3	7.5				8	8.6			8.3	8.6			8.8	9.3
	770	6	6.6	6.7				6.6	7			8.4	8.6			7.3	7.5
	770	7	7.2	7.6				7.1	7.4			7	7.3			7	7.5
	770	Blank 8	5.1	5.1				5	5			5	5			5.1	5.1

## Sheet: CA inhibitorson Pmax
Raw data		CA inhibitors on Pmax
		AZ				EZ				AZ+EZ				Control Treatment (No inhibitors)
Irradiance (μmol photons·m-2·s-1)	Repetitions	Initial O2 production	Final O2 production	Dry weight (g)		Initial O2 production	Final O2 production	Dry weight (g)		Initial O2 production	Final O2 production	Dry weight (g)		Initial O2 production	Final O2 production	Dry weight (g)
170	1	6.1	6.9	0.0568		6.2	6.9	0.0888		6.3	6.7	0.0715		6.3	7	0.0618
170	2	6	6.9	0.0631		6.2	7	0.0868		6.3	6.7	0.0675		6.3	7	0.0583
170	3	6.1	7.1	0.0996		6.3	6.8	0.0759		6.3	6.8	0.0681		6.2	6.7	0.0665
170	4	6.1	6.8	0.0612		6.2	6.9	0.0686		6.3	6.7	0.0572		6.3	6.8	0.085
170	5	6.1	6.8	0.0724		6.3	6.9	0.0792		6.3	6.7	0.0589		6.2	7	0.0631
170	6	6.2	6.9	0.0934		6.2	6.7	0.0739		6.3	6.6	0.0571		6.3	6.8	0.0822
170	7	6.1	6.6	0.0615		6.2	6.8	0.0908		6.2	6.4	0.0361		6.2	6.8	0.0609
170	Blank 8	6.1	6.1			6.2	6.2			6.3	6.3			6.3	6.3
200	1	6.9	7.5			6.9	7.4			6.7	7.1			7	7.7
200	2	6.9	7.7			7	7.6			6.7	6.9			7	7.6
200	3	7.1	8			6.8	7.4			6.8	7.3			6.7	7.1
200	4	6.8	7.4			6.9	7.4			6.7	7.1			6.8	7.4
200	5	6.8	7.7			6.9	7.5			6.7	7.2			7	7.7
200	6	6.9	7.4			6.7	7.4			6.6	7			6.8	7.4
200	7	6.6	7.4			6.8	7.4			6.4	6.6			6.8	7.5
200	Blank 8	6.1	6.1			6.2	6.2			6.3	6.3			6.3	6.3
270	1	7.5	8.1			7.4	7.7			7.1	7.5			7.7	8.2
270	2	7.7	8.3			7.6	8			6.9	7.3			7.6	8
270	3	8	8.8			7.4	7.9			7.3	7.7			7.1	7.5
270	4	7.4	7.8			7.4	8			7.1	7.5			7.4	8.1
270	5	7.7	8.4			7.5	8.1			7.2	7.6			7.7	8.3
270	6	7.4	8.2			7.4	8			7	7.1			7.4	8.1
270	7	7.4	7.9			7.4	8			6.6	6.8			7.5	8.2
270	Blank 8	6.1	6.1			6.2	6.2			6.3	6.3			6.3	6.3
